# Supplementary material for: GRA86 Is a Novel Dense Granule Protein Important for Virulence and Bradyzoite Differentiation in Toxoplasma gondii
Source: MDPI journal article supplement (doi:10.3390/ani15172591), 2025-09-03
Supplement: s1 [file Figure S1.pdf › Supplementary Figures/Figure S1.pdf]

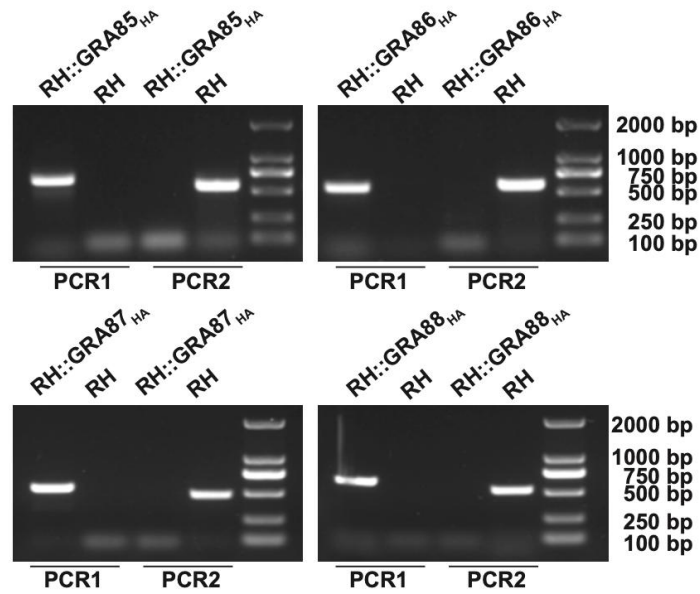

**Figure S1.** Validation of endogenously HA-tagged GRA85–88 strains in the RH background. PCR analysis confirming successful tagging of GRAs with a C-terminal 6×HA epitope. PCR1 detects the insertion of the HA tag near the stop codon of each *gra* gene. PCR2 verifies correct integration by amplifying the 3' region replaced by the HA tag.
