# Supplementary material for: GRA86 Is a Novel Dense Granule Protein Important for Virulence and Bradyzoite Differentiation in Toxoplasma gondii
Source: MDPI journal article supplement (doi:10.3390/ani15172591), 2025-09-03
Supplement: s1 [file Figure S2.pdf › Supplementary Figures/Figure S2.pdf]

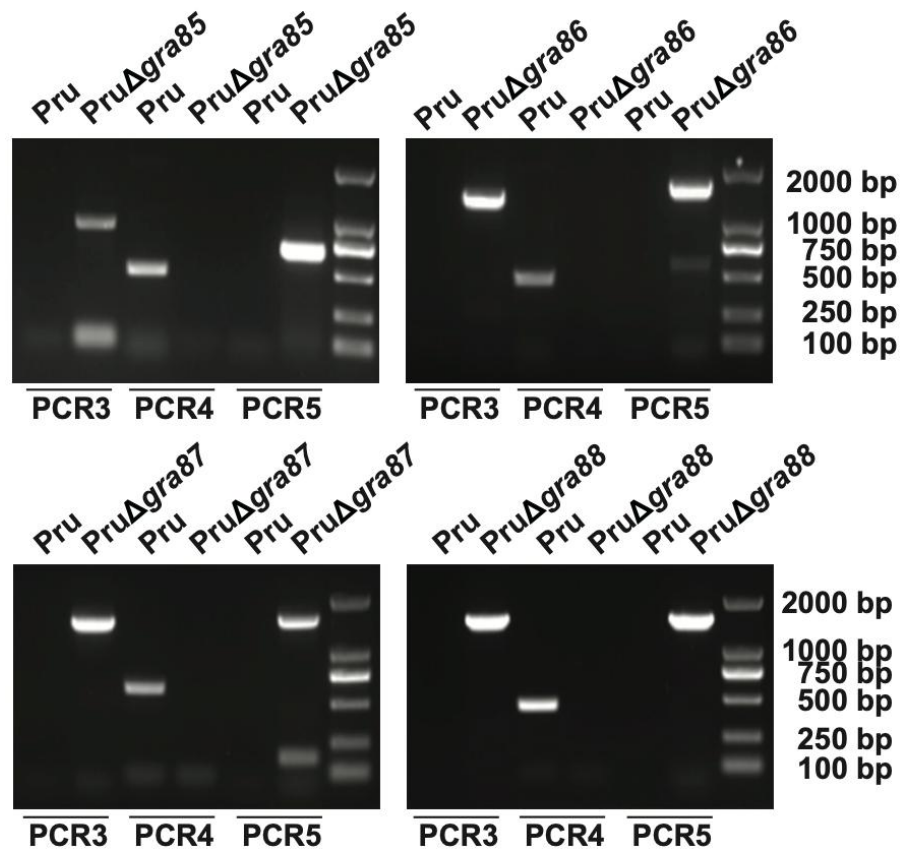

**Figure S2.** Generation and validation of four *gra* gene knockout strains (PruΔ*gra*85–88). PCR analysis confirming successful deletion of *gra*85–88 in the type II Pru strain. PCR3 and PCR5 verify replacement of the 5' and 3' untranslated regions (UTRs), respectively, with the DHFR selection cassette. PCR4 confirms deletion of the *gra* coding sequences.
